# Supplementary material for: IrO2–TiO2 electrocatalysts for the hydrogen evolution reaction in acidic water electrolysis without activation
Source: Royal Society of Chemistry journal article supplement (doi:10.1039/c7nj00756f), 2017-01-01
Supplement: c7nj00756f1.pdf [file c7nj00756f1.pdf]

## Supporting information

### **IrO<sub>2</sub>-TiO<sub>2</sub> electrocatalyst for the hydrogen evolution reaction in acidic water electrolysis without activation**

Min Yuan, Yuchan Zhu, Li Deng, Ruoxi Ming, Ailian Zhang, Wenyang Li, Bo Chai and Zhandong Ren\*

School of Chemical and Environmental Engineering, Wuhan Polytechnic University, Wuhan, 430023, P. R. China.

E-mail: renzhandong@163.com

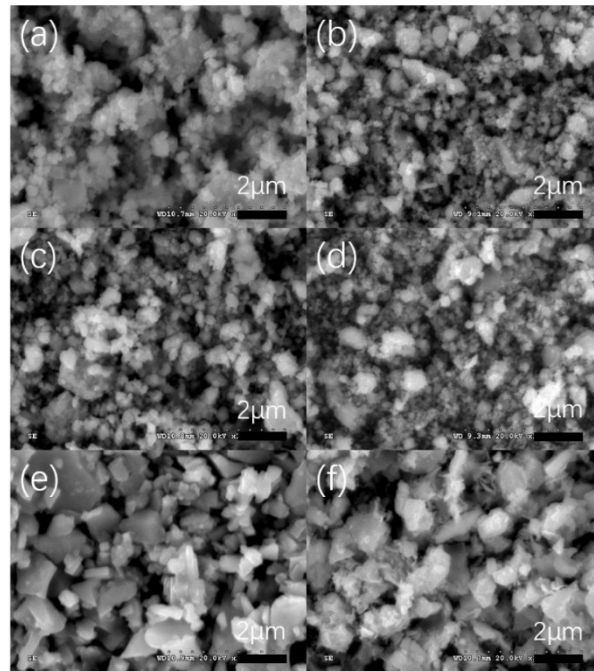

Fig. S1† SEM diagrams of IrO<sub>2</sub>-TiO<sub>2</sub> composite oxides (TiO<sub>2</sub> mol%=14%) and IrO<sub>2</sub> oxides with different calcination temperature. IrO<sub>2</sub>-TiO<sub>2</sub>: (a) 450 °C, (b) 500 °C, (c) 550 °C, (d) 600 °C; IrO<sub>2</sub>: (e) 450 °C, (f) 550 °C.

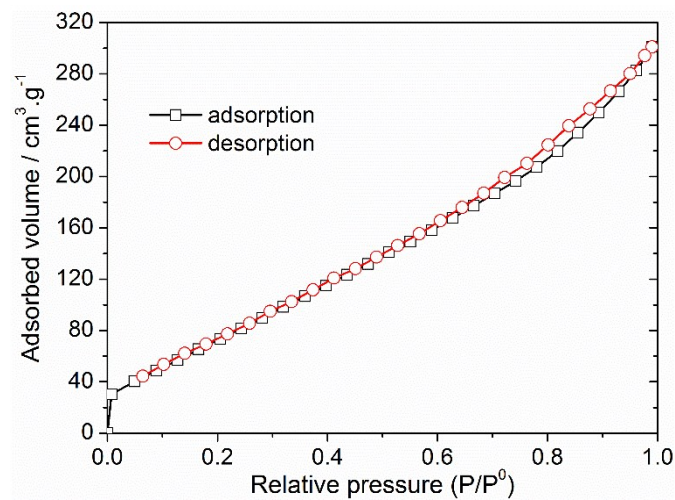

Fig. S2† N<sub>2</sub> adsorption/desorption isotherms of IrO<sub>2</sub>-TiO<sub>2</sub> composite oxide (TiO<sub>2</sub> mol%=14%, Calcination temperature 550 °C).

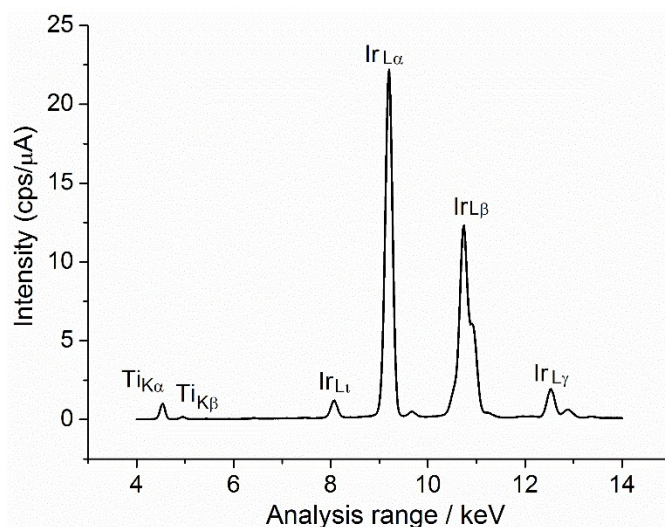

Fig. S3+ X-ray fluorescence spectrometry of Ir and Ti in  $\text{IrO}_2\text{-TiO}_2$  composite oxide ( $\text{TiO}_2$  mol%=14%, Calcination temperature  $550^\circ\text{C}$ ).

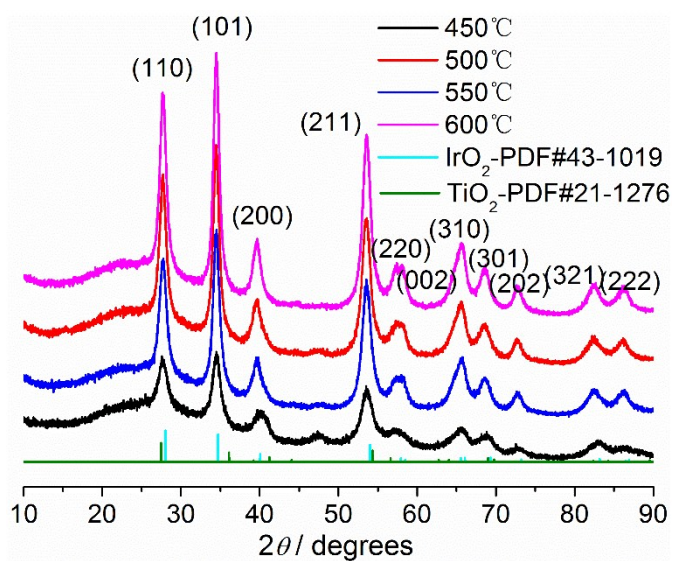

Fig. S4+ XRD diagrams of  $\text{IrO}_2\text{-TiO}_2$  complex oxides ( $\text{TiO}_2$  mol%=14%) with different calcination temperature.

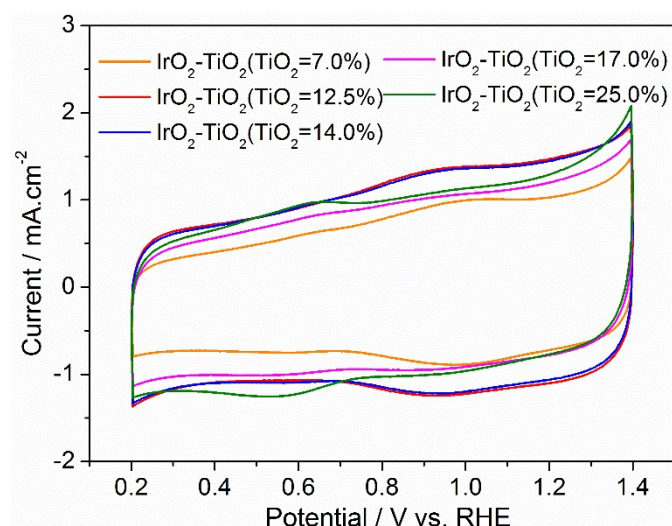

Fig. S5† Cyclic voltammograms in 0.5 mol·L<sup>-1</sup> H<sub>2</sub>SO<sub>4</sub> solution at a sweeping rate of 100 mV·s<sup>-1</sup> for IrO<sub>2</sub>-TiO<sub>2</sub> electrodes with different mole fraction TiO<sub>2</sub> at the calcined temperature 550°C.

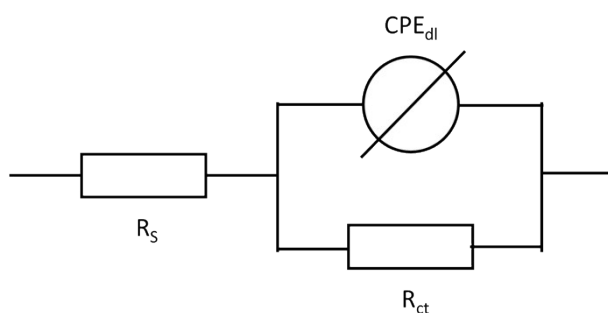

Fig. S6† The equivalent circuit of the impedance of IrO<sub>2</sub>-TiO<sub>2</sub> and IrO<sub>2</sub> electrodes.

Table S2† Impedance parameters of IrO<sub>2</sub>-TiO<sub>2</sub> and IrO<sub>2</sub> electrodes obtained by fitting the experimental data to  $R_s(R_{ct}C_{dl})$  equivalent circuit.

| Electrocatalyst                    | $R_s$<br>/ $\Omega \cdot \text{cm}^2$ | $R_{ct}$<br>/ $\Omega \cdot \text{cm}^2$ | $C_{dl}$<br>/ $\text{mF} \cdot \text{cm}^{-2}$ | $n_{dl}$ | $R_f$ |
|------------------------------------|---------------------------------------|------------------------------------------|------------------------------------------------|----------|-------|
| IrO <sub>2</sub>                   | 11.32                                 | 198.7                                    | 1.13                                           | 0.77671  | 56.5  |
| IrO <sub>2</sub> -TiO <sub>2</sub> | 9.281                                 | 48.00                                    | 2.70                                           | 0.92944  | 135   |

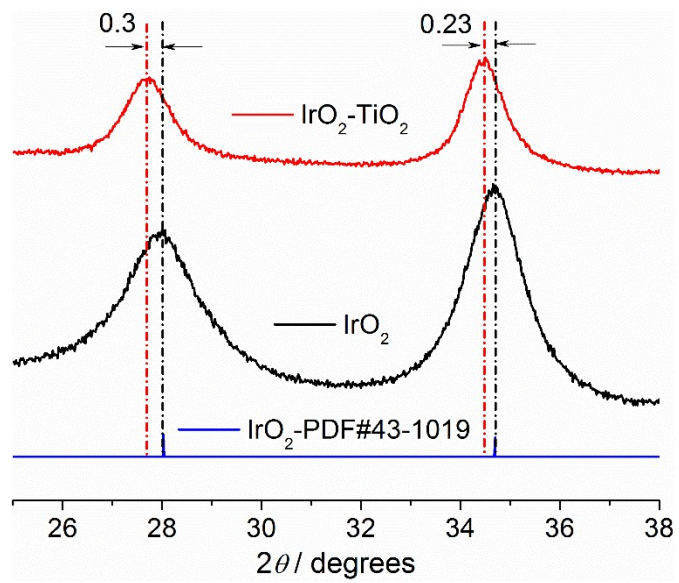

Fig. S7+ XRD diagram of  $\text{IrO}_2\text{-TiO}_2$  complex oxide ( $\text{TiO}_2$  mol%=14%, calcination temperature  $550^\circ\text{C}$ ) and  $\text{IrO}_2$  (calcination temperature  $550^\circ\text{C}$ ).
